# Supplementary material for: Mediators of episodic memory decay across the adult life span
Source: PubMed Central journal article supplement (PMC5805709; doi:10.1038/s41598-018-20884-2), 2018-02-08
Supplement: 41598_2018_20884_MOESM1_ESM.pdf [file 41598_2018_20884_MOESM1_ESM.pdf]

## **SUPPLEMENTARY INFORMATION**

### **Mediators of episodic memory decay across the adult life span**

Selene Cansino\*, Frine Torres-Trejo, Cinthya Estrada-Manilla, Evelia Hernández-Ramos, Joyce Graciela Martínez-Galindo, Tania Gómez-Fernández, Mariana Ayala-Hernández, María Dolores Ramírez-González and Silvia Ruiz-Velasco

**Full results.** Supplementary Table S2 displays the descriptive analyses conducted on all variables. Because skewness increased after being log-transformed for some variables, no transformed data were used for these variables. The subsequent analyses were also conducted with data without any transformation, and results revealed no differences from those performed with transformed data. The results of the linear regression analyses computed between all variables and correct source accuracy are displayed in Supplementary Table S3. A total of 70 linear regressions turned out to be significant, thus these variables were included as mediator variables in the first SEM analyses. The fitted model was fine-tuned by eliminating mediator variables with paths that were no longer significant; only 20 mediator variables were retained in the model. The second SEM estimation computed with these variables revealed that the paths for six other mediator variables were not significant, thus, they were eliminated from the model. The SEM analysis was conducted again with only 14 mediator variables. All paths in this model were significant (Figure 2).

The correlation matrix of the final model is presented in Supplementary Table S4. The inspection of modification indices showed some model misspecifications due to related

variables. One of them was observed between the scores from the MMSE and the Anxiety scale of the MIA. Another misspecification was observed between heart rate and mean arterial pressure, and the others were observed between the following nutrient and food consumptions: sodium and cholesterol, sodium and linoleic acid, cholesterol and linoleic acid, and linoleic acid and processed food. Because these variables are strongly theoretically related, we added error covariance terms between these variables. The goodness-of-fit for the final model was  $\chi^2(85) = 243.56, P < .0001$ ; relative  $\chi^2 = 2.87$ ; CFI = 0.96; RMSEA = .035; and SRMS = .032. The SEM results are depicted in Supplementary Table S5, and for reference, we present the coefficients from the model fitted with variables that were not log-transformed. Similar results were obtained in both SEM analyses. The coefficient of determination (CD) of the model was 0.53.

The bootstrapped test of mediation revealed that the indirect effects of each mediator variable were significant as revealed by their bias-corrected 95% confidence intervals (Figure 3). However, the total indirect effect of age through all mediator variables was not significant [ $\beta$  (95% CI) = -.023 (-.057, .013)]. The direct effect of age on source memory was  $\beta = -.595$ , and thus the proportion of the total effect that was mediated was .037.

Supplementary Table S1. Participants' characteristics and performance on neuropsychological tests by decade. Means and standard deviations appear in parentheses.

| Decade | Participants<br>(number) | Sex<br>(women/men) | Education<br>(years) | MMSE         | Vocabulary<br>scale (WAIS-R) | BDI         |
|--------|--------------------------|--------------------|----------------------|--------------|------------------------------|-------------|
| 21-30  | 265                      | 131/134            | 15.95 (1.87)         | 29.13 (1.11) | 12.99 (1.48)                 | 6.24 (5.01) |
| 31-40  | 257                      | 128/129            | 15.93 (3.51)         | 28.89 (1.15) | 12.54 (1.67)                 | 5.93 (5.07) |
| 41-50  | 256                      | 131/125            | 14.92 (4.32)         | 28.70 (1.26) | 12.64 (1.76)                 | 6.60 (5.01) |
| 51-60  | 260                      | 129/131            | 14.56 (4.77)         | 28.48 (1.35) | 12.70 (1.66)                 | 6.17 (4.90) |
| 61-70  | 255                      | 131/124            | 13.58 (4.45)         | 28.35 (1.35) | 12.73 (1.91)                 | 6.49 (4.96) |
| 71-80  | 264                      | 134/130            | 12.98 (4.49)         | 28.02 (1.52) | 12.87 (1.74)                 | 7.76 (5.09) |

*Note.* MMSE = Mini Mental State Scale, WAIS-R = Wechsler Adult Intelligence Scale-Revised, BDI = Beck Depression Inventory.

Supplementary Table S2. Descriptive statistics; the non-normal variables were log-transformed.

| Variables                                     | Mean or number | <i>SD</i> | Skewness | Kurtosis |
|-----------------------------------------------|----------------|-----------|----------|----------|
| Age (years)                                   | 50.12          | 17.57     | -0.08    | 1.80     |
| Sex (women/men) <sup>a</sup>                  | 784/773        |           |          |          |
| Education (years)                             | 14.66          | 4.16      | 0.38     | 2.92     |
| Income (ranks)                                | 5.26           | 1.93      | 0.27     | 2.35     |
| Retirement (years) <sup>c</sup>               | 0.56           | 1.00      | 1.51     | 3.85     |
| Vocabulary scale (WAIS-R)                     | 12.75          | 1.71      | 0.09     | 2.64     |
| Mini Mental State Examination                 | 28.59          | 1.35      | -0.90    | 3.35     |
| Beck Depression Inventory                     | 6.54           | 5.03      | 0.69     | 2.65     |
| Social Readjustment Rating Scale <sup>c</sup> | 2.13           | 0.59      | -0.68    | 3.37     |
| MIA: Strategy                                 | 55.50          | 11.87     | -0.08    | 2.69     |
| MIA: Task <sup>c</sup>                        | 58.85          | 6.84      | -0.46    | 3.78     |
| MIA: Capacity                                 | 55.67          | 9.69      | -0.26    | 2.81     |
| MIA: Change                                   | 51.20          | 13.06     | -0.08    | 2.32     |
| MIA: Anxiety                                  | 40.90          | 9.76      | 0.23     | 2.50     |
| MIA: Achievement <sup>c</sup>                 | 4.07           | 0.13      | -0.67    | 3.97     |
| MIA: Locus <sup>c</sup>                       | 3.63           | 0.15      | -0.84    | 4.38     |
| Illnesses (number) <sup>c</sup>               | 1.51           | 0.60      | -0.66    | 3.34     |
| Hypertension (no/yes) <sup>a</sup>            | 1311/246       |           |          |          |
| Arrhythmia (no/yes) (no/yes) <sup>a</sup>     | 1538/19        |           |          |          |
| Myocardial infarction (no/yes) <sup>a</sup>   | 1536/21        |           |          |          |
| Hypotension (no/yes) <sup>a</sup>             | 1517/40        |           |          |          |
| Hypercholesterolemia (no/yes) <sup>a</sup>    | 1480/77        |           |          |          |
| Presbyopia (no/yes) <sup>a</sup>              | 1137/420       |           |          |          |
| Cataracts (no/yes) <sup>a</sup>               | 1515/42        |           |          |          |
| Hypoacusis (no/yes) <sup>a</sup>              | 1524/33        |           |          |          |
| Diabetes mellitus (no/yes) <sup>a</sup>       | 1457/100       |           |          |          |
| Initial insomnia (no/yes) <sup>a</sup>        | 1436/121       |           |          |          |
| Terminal insomnia (no/yes) <sup>a</sup>       | 1507/50        |           |          |          |
| Intermittent insomnia (no/yes) <sup>a</sup>   | 1488/69        |           |          |          |
| Body mass index (k/m2) <sup>c</sup>           | 3.30           | 0.15      | 0.20     | 3.35     |
| Glucose (mg/dL) <sup>c</sup>                  | 4.53           | 0.45      | -1.61    | 6.83     |
| Cholesterol (mg/dL) <sup>c</sup>              | 5.19           | 0.18      | 0.39     | 4.86     |
| Triglycerides (mg/dL) <sup>c</sup>            | 5.24           | 0.57      | 0.06     | 2.25     |
| Heart rate (bpm)                              | 69.62          | 11.22     | 0.21     | 3.60     |
| Systolic blood pressure (mmHg) <sup>c</sup>   | 4.77           | 0.15      | 0.21     | 3.07     |
| Diastolic blood pressure (mmHg) <sup>c</sup>  | 4.31           | 0.14      | 0.12     | 3.52     |
| Mean arterial pressure (mmHg) <sup>c</sup>    | 4.48           | 0.14      | 0.17     | 3.32     |
| Protein (g) <sup>c</sup>                      | 3.71           | 0.46      | -0.35    | 3.59     |
| Energy (kcal) <sup>c</sup>                    | 7.71           | 0.36      | -0.21    | 3.39     |
| Carbohydrates (g) <sup>c</sup>                | 5.68           | 0.38      | -0.41    | 3.79     |
| Sucrose (g) <sup>c</sup>                      | 3.69           | 0.51      | -0.18    | 3.17     |
| Fructose (g) <sup>c</sup>                     | 3.36           | 0.50      | -0.05    | 3.48     |

|                                           |      |      |       |       |
|-------------------------------------------|------|------|-------|-------|
| Glucose (g) <sup>c</sup>                  | 3.09 | 0.52 | -0.06 | 3.46  |
| Calcium (mg) <sup>c</sup>                 | 6.62 | 0.47 | -0.34 | 3.06  |
| Magnesium (mg) <sup>c</sup>               | 5.83 | 0.36 | -0.28 | 3.82  |
| Phosphorus (mg) <sup>c</sup>              | 7.13 | 0.38 | -0.32 | 3.64  |
| Potassium (mg) <sup>c</sup>               | 8.10 | 0.39 | -0.09 | 3.58  |
| Sodium (mg) <sup>c</sup>                  | 7.48 | 0.42 | -0.09 | 3.46  |
| Nitrate (g) <sup>c</sup>                  | 4.19 | 0.58 | 0.09  | 3.70  |
| Iron (mg) <sup>c</sup>                    | 2.64 | 0.35 | 0.00  | 3.72  |
| Copper (mg) <sup>c</sup>                  | 1.26 | 0.42 | 0.90  | 4.93  |
| Manganese (mg) <sup>c</sup>               | 2.70 | 0.85 | -0.04 | 2.53  |
| Selenium (mcg) <sup>c</sup>               | 3.59 | 0.55 | -0.09 | 4.53  |
| Zinc (mg) <sup>c</sup>                    | 2.91 | 0.48 | 0.36  | 4.03  |
| Retinol (UI) <sup>c</sup>                 | 7.80 | 0.67 | 0.44  | 4.03  |
| Carotenes (UI) <sup>c</sup>               | 8.84 | 0.68 | -0.40 | 3.35  |
| Alpha-carotene (mcg) <sup>c</sup>         | 5.71 | 1.10 | -0.67 | 3.60  |
| Beta-carotene (mcg) <sup>c</sup>          | 8.01 | 0.69 | -0.48 | 4.15  |
| Beta-cryptoxanthin (mcg) <sup>c</sup>     | 6.11 | 1.11 | -1.32 | 6.46  |
| Lutein & xanthine (mcg) <sup>c</sup>      | 7.31 | 0.75 | -0.18 | 3.63  |
| Lycopene (mcg) <sup>c</sup>               | 8.54 | 0.79 | -1.30 | 13.77 |
| Thiamine (mg) <sup>c</sup>                | 0.98 | 0.25 | 0.32  | 3.41  |
| Riboflavin (mg) <sup>c</sup>              | 1.01 | 0.27 | 0.45  | 3.93  |
| Niacin (mg) <sup>c</sup>                  | 3.02 | 0.35 | 0.00  | 3.35  |
| Pantothenic acid (mg) <sup>c</sup>        | 2.45 | 0.59 | 0.47  | 3.55  |
| Vitamin B6 glycosylated (mg) <sup>c</sup> | 1.83 | 0.77 | 0.22  | 2.80  |
| Folates (mcg) <sup>c</sup>                | 6.58 | 0.75 | 0.21  | 3.15  |
| Vitamin B12 (mcg) <sup>c</sup>            | 1.94 | 0.57 | 0.49  | 4.10  |
| Vitamin C (mg) <sup>c</sup>               | 5.28 | 0.63 | -0.44 | 3.53  |
| Vitamin D (UI) <sup>c</sup>               | 5.15 | 0.66 | -0.37 | 2.94  |
| Alpha-tocopherol (mg) <sup>c</sup>        | 2.55 | 0.41 | 0.28  | 3.69  |
| Beta-tocopherol (mg) <sup>c</sup>         | 0.53 | 0.21 | 0.73  | 3.89  |
| Gamma-tocopherol (mg) <sup>c</sup>        | 2.58 | 0.54 | 0.05  | 3.09  |
| Delta-tocopherol (mg) <sup>c</sup>        | 1.16 | 0.42 | 0.60  | 3.72  |
| Vitamin K (mcg) <sup>c</sup>              | 4.41 | 0.57 | 0.05  | 3.65  |
| Alcohol (g) <sup>c</sup>                  | 0.52 | 0.75 | 1.57  | 5.13  |
| Caffeine (g) <sup>c</sup>                 | 3.97 | 1.74 | -0.61 | 2.45  |
| Cholesterol (g) <sup>c</sup>              | 5.46 | 0.56 | -0.24 | 4.16  |
| Butyric acid (g) <sup>c</sup>             | 0.29 | 0.19 | 0.87  | 4.39  |
| Caproic acid (g) <sup>c</sup>             | 0.19 | 0.14 | 0.91  | 5.10  |
| Caprylic acid (g) <sup>c</sup>            | 0.11 | 0.08 | 1.38  | 7.96  |
| Capric acid (g) <sup>c</sup>              | 0.27 | 0.16 | 0.92  | 4.93  |
| Lauric acid (g) <sup>c</sup>              | 0.32 | 0.18 | 0.73  | 3.69  |
| Myristic acid (g) <sup>c</sup>            | 0.94 | 0.35 | 0.13  | 2.54  |
| Palmitic acid (g) <sup>c</sup>            | 2.56 | 0.40 | -0.01 | 3.12  |
| Stearic acid (g) <sup>c</sup>             | 1.80 | 0.39 | 0.00  | 3.18  |
| Palmitoleic acid (g) <sup>c</sup>         | 0.90 | 0.27 | 0.47  | 3.84  |
| Oleic acid (g) <sup>c</sup>               | 2.89 | 0.46 | -0.08 | 3.33  |
| Gadoleic acid (g) <sup>c</sup>            | 0.14 | 0.08 | 1.56  | 7.11  |

|                                        |       |       |       |         |
|----------------------------------------|-------|-------|-------|---------|
| Linoleic acid (g) <sup>c</sup>         | 2.22  | 0.46  | 0.21  | 3.12    |
| Alpha-linoleic acid (g) <sup>c</sup>   | 0.87  | 0.29  | 0.85  | 4.27    |
| Eicosatetraenoic acid (g) <sup>c</sup> | 0.07  | 0.05  | 2.17  | 10.74   |
| Eicosapentaenoic acid (g) <sup>c</sup> | 0.06  | 0.06  | 3.87  | 35.91   |
| Docosahexaenoic acid (g) <sup>c</sup>  | 0.16  | 0.13  | 2.46  | 17.70   |
| Canned food (fr)                       | 4.86  | 1.85  | 0.36  | 3.22    |
| Processed food (fr)                    | 3.91  | 2.60  | 0.59  | 2.30    |
| Antidepressants <sup>b c</sup>         | 0.10  | 0.44  | 5.49  | 36.81   |
| Hypnotics <sup>b c</sup>               | 0.04  | 0.26  | 9.21  | 101.42  |
| Anxiolytics <sup>b c</sup>             | 0.08  | 0.42  | 6.06  | 42.19   |
| Hormonal therapy <sup>b</sup>          | 5.51  | 20.74 | 5.30  | 35.76   |
| Analgesics <sup>b c</sup>              | 0.13  | 0.58  | 5.21  | 31.21   |
| Amphetamines <sup>b c</sup>            | 0.03  | 0.23  | 9.49  | 100.56  |
| Cannabis <sup>b c</sup>                | 0.06  | 0.36  | 8.19  | 79.09   |
| Hallucinogens <sup>b c</sup>           | 0.00  | 0.04  | 33.51 | 1207.35 |
| Cocaine <sup>b c</sup>                 | 0.02  | 0.17  | 14.98 | 254.85  |
| Tobacco <sup>b c</sup>                 | 2.02  | 2.24  | 0.44  | 1.48    |
| Cigarettes (Number) <sup>c</sup>       | 0.90  | 1.05  | 0.89  | 2.71    |
| Alcohol <sup>b c</sup>                 | 1.60  | 1.44  | 0.74  | 2.70    |
| Alcohol (gr/week) <sup>c</sup>         | 2.24  | 1.83  | 0.50  | 2.45    |
| Beer (fr) <sup>c</sup>                 | 0.43  | 0.76  | 1.27  | 2.77    |
| Wine (fr) <sup>c</sup>                 | 0.17  | 0.52  | 2.85  | 9.65    |
| Liqueur (fr) <sup>c</sup>              | 0.03  | 0.22  | 7.06  | 54.47   |
| Spirit (fr) <sup>c</sup>               | 0.64  | 0.81  | 0.62  | 1.64    |
| Physical activity <sup>b</sup>         | 1.29  | 3.48  | 4.11  | 23.62   |
| Television <sup>b</sup>                | 13.67 | 9.86  | 1.71  | 8.46    |
| Radio <sup>b c</sup>                   | 2.46  | 1.10  | -0.65 | 2.96    |
| Computer use <sup>b c</sup>            | 0.63  | 1.24  | 1.68  | 4.23    |
| Reading <sup>b c</sup>                 | 1.73  | 0.97  | -0.18 | 2.31    |
| Hobbies <sup>b c</sup>                 | 0.74  | 1.02  | 1.09  | 2.90    |
| Cultural activities (fr)               | 3.77  | 2.14  | -0.49 | 2.19    |
| Social activities (fr)                 | 4.27  | 1.85  | -0.57 | 3.00    |
| Source memory (%)                      | 60.25 | 18.58 | -0.23 | 2.22    |

Note. <sup>a</sup> Dichotomous variable

<sup>b</sup> Total intake or time = frequency x duration

<sup>c</sup> Log transformed variable

fr = frequency, WAIS-R = Wechsler Adult Intelligence Scale-Revised, MIA = Metamemory in Adulthood Scale

Supplementary Table S3. Linear regressions between each independent variable and correct source memory (%).

| Variables                                         | <i>b</i> | <i>SE b</i> | $\beta$ | <i>t</i> | <i>P</i> |
|---------------------------------------------------|----------|-------------|---------|----------|----------|
| Age (years)                                       | -0.617   | 0.020       | -.584   | -30.125  | .000     |
| sex <sup>a</sup>                                  | -0.387   | 0.942       | -.010   | -0.410   | .682     |
| Education (years)                                 | 0.938    | 0.114       | .210    | 8.260    | .000     |
| Income (ranks)                                    | 0.239    | 0.190       | .025    | 1.260    | .208     |
| Retirement (years) <sup>c</sup>                   | -6.277   | 0.430       | -.338   | -14.604  | .000     |
| Vocabulary scale (WAIS-R)                         | 0.961    | 0.277       | .088    | 3.465    | .001     |
| Mini Mental State Examination                     | 3.055    | 0.327       | .221    | 9.330    | .000     |
| Beck Depression Inventory                         | -0.340   | 0.094       | -.092   | -3.606   | .000     |
| Social Readjustment Rating Scale <sup>c</sup>     | 7.501    | 0.762       | .237    | 9.849    | .000     |
| MIA: Strategy                                     | -0.039   | 0.039       | -.025   | -0.987   | .324     |
| MIA: Task <sup>c</sup>                            | 10.283   | 4.030       | .067    | 2.552    | .011     |
| MIA: Capacity                                     | 0.351    | 0.048       | .183    | 7.294    | .000     |
| MIA: Change                                       | 0.426    | 0.034       | .300    | 12.618   | .000     |
| MIA: Anxiety                                      | -0.386   | 0.047       | -.203   | -8.140   | .000     |
| MIA: Achievement <sup>c</sup>                     | -18.115  | 3.699       | -.123   | -4.897   | .000     |
| MIA: Locus <sup>c</sup>                           | 16.051   | 3.022       | .127    | 5.312    | .000     |
| Illnesses (number) <sup>c</sup>                   | -3.237   | 0.764       | -.105   | -4.236   | .000     |
| Hypertension <sup>a</sup>                         | -10.007  | 1.165       | -.196   | -8.589   | .000     |
| Arrhythmia <sup>a</sup>                           | -12.264  | 3.796       | -.072   | -3.230   | .001     |
| Myocardial infarction <sup>a</sup>                | -9.823   | 4.101       | -.061   | -2.395   | .017     |
| Hypotension <sup>a</sup>                          | -0.230   | 2.038       | -.002   | -0.113   | .910     |
| Hypercholesterolemia <sup>a</sup>                 | -8.250   | 2.247       | -.096   | -3.671   | .000     |
| Presbyopia <sup>a</sup>                           | -9.685   | 0.998       | -.231   | -9.708   | .000     |
| Cataracts <sup>a</sup>                            | -13.132  | 2.836       | -.115   | -4.631   | .000     |
| Hypoacusis <sup>a</sup>                           | -9.368   | 2.844       | -.073   | -3.294   | .001     |
| Diabetes mellitus <sup>a</sup>                    | -10.381  | 1.700       | -.137   | -6.106   | .000     |
| Initial insomnia <sup>a</sup>                     | 2.939    | 1.674       | .042    | 1.756    | .079     |
| Terminal insomnia <sup>a</sup>                    | -3.401   | 2.632       | -.032   | -1.292   | .196     |
| Intermittent insomnia <sup>a</sup>                | -5.922   | 2.436       | -.066   | -2.431   | .015     |
| Body mass index (kg/m <sup>2</sup> ) <sup>c</sup> | -11.485  | 3.180       | -.091   | -3.612   | .000     |
| Glucose (mg/dL) <sup>c</sup>                      | -4.366   | 1.005       | -.106   | -4.345   | .000     |
| Cholesterol (mg/dL) <sup>c</sup>                  | -19.376  | 2.599       | -.187   | -7.455   | .000     |
| Triglycerides (mg/dL) <sup>c</sup>                | -4.511   | 0.793       | -.139   | -5.688   | .000     |
| Heart rate (bpm)                                  | -0.082   | 0.034       | -.050   | -2.410   | .016     |
| Systolic blood pressure (mmHg) <sup>c</sup>       | -32.192  | 3.028       | -.253   | -10.632  | .000     |
| Diastolic blood pressure (mmHg) <sup>c</sup>      | -12.965  | 3.464       | -.095   | -3.742   | .000     |
| Mean arterial pressure (mmHg) <sup>c</sup>        | 7.381    | 3.047       | .054    | 2.422    | .016     |
| Protein (g) <sup>c</sup>                          | 3.232    | 1.032       | .080    | 3.132    | .002     |
| Energy (kcal) <sup>c</sup>                        | 4.070    | 1.321       | .078    | 3.080    | .002     |
| Carbohydrates (g) <sup>c</sup>                    | 0.778    | 1.235       | .016    | 0.630    | .529     |
| Sucrose (g) <sup>c</sup>                          | 0.277    | 0.971       | .008    | 0.286    | .775     |
| Fructose (g) <sup>c</sup>                         | -0.715   | 0.964       | -.019   | -0.742   | .458     |

|                                           |        |       |       |        |      |
|-------------------------------------------|--------|-------|-------|--------|------|
| Glucose (g) <sup>c</sup>                  | 0.445  | 0.937 | .012  | 0.475  | .635 |
| Calcium (mg) <sup>c</sup>                 | 0.158  | 1.021 | .004  | 0.154  | .877 |
| Magnesium (mg) <sup>c</sup>               | -1.050 | 1.369 | -.020 | -0.767 | .443 |
| Phosphorus (mg) <sup>c</sup>              | 2.055  | 1.256 | .042  | 1.636  | .102 |
| Potassium (mg) <sup>c</sup>               | -0.941 | 1.265 | -.020 | -0.744 | .457 |
| Sodium (mg) <sup>c</sup>                  | 2.325  | 1.125 | .052  | 2.070  | .039 |
| Nitrate (g) <sup>c</sup>                  | -0.492 | 0.825 | -.015 | -0.596 | .551 |
| Iron (mg) <sup>c</sup>                    | 0.321  | 1.411 | .006  | 0.227  | .820 |
| Copper (mg) <sup>c</sup>                  | -1.426 | 1.154 | -.032 | -1.237 | .216 |
| Manganese (mg) <sup>c</sup>               | -0.512 | 0.452 | -.023 | -1.131 | .258 |
| Selenium (mcg) <sup>c</sup>               | 1.278  | 0.860 | .038  | 1.487  | .137 |
| Zinc (mg) <sup>c</sup>                    | 0.130  | 1.004 | .003  | 0.129  | .897 |
| Retinol (UI) <sup>c</sup>                 | 0.997  | 0.714 | .036  | 1.396  | .163 |
| Carotenes (UI) <sup>c</sup>               | -0.362 | 0.577 | -.013 | -0.627 | .531 |
| Alpha-carotene (mcg) <sup>c</sup>         | -0.305 | 0.353 | -.018 | -0.865 | .387 |
| Beta-carotene (mcg) <sup>c</sup>          | -0.056 | 0.557 | -.002 | -0.10  | .920 |
| Beta-cryptoxanthin (mcg) <sup>c</sup>     | -0.541 | 0.346 | -.032 | -1.562 | .118 |
| Lutein & xanthine (mcg) <sup>c</sup>      | -1.150 | 0.640 | -.047 | -1.798 | .072 |
| Lycopene (mcg) <sup>c</sup>               | 0.865  | 0.627 | .037  | 1.381  | .168 |
| Thiamine (mg) <sup>c</sup>                | 3.186  | 1.965 | .042  | 1.622  | .105 |
| Riboflavin (mg) <sup>c</sup>              | 1.993  | 1.784 | .029  | 1.117  | .264 |
| Niacin (mg) <sup>c</sup>                  | 2.940  | 1.377 | .056  | 2.135  | .033 |
| Pantothenic acid (mg) <sup>c</sup>        | -1.234 | 0.819 | -.039 | -1.507 | .132 |
| Vitamin B6 glycosylated (mg) <sup>c</sup> | 1.986  | 0.594 | .082  | 3.341  | .001 |
| Folates (mcg) <sup>c</sup>                | -0.429 | 0.514 | -.017 | -0.830 | .404 |
| Vitamin B12 (mcg) <sup>c</sup>            | 1.554  | 0.837 | .047  | 1.857  | .064 |
| Vitamin C (mg) <sup>c</sup>               | -0.932 | 0.630 | -.032 | -1.480 | .139 |
| Vitamin D (UI) <sup>c</sup>               | -1.133 | 0.584 | -.040 | -1.941 | .052 |
| Alpha-tocopherol (mg) <sup>c</sup>        | 4.187  | 1.144 | .091  | 3.661  | .000 |
| Beta-tocopherol (mg) <sup>c</sup>         | 5.662  | 2.243 | .064  | 2.524  | .012 |
| Gamma-tocopherol (mg) <sup>c</sup>        | 5.874  | 0.812 | .172  | 7.231  | .000 |
| Delta-tocopherol (mg) <sup>c</sup>        | 7.681  | 1.080 | .175  | 7.115  | .000 |
| Vitamin K (mcg) <sup>c</sup>              | 1.299  | 0.854 | .040  | 1.522  | .128 |
| Alcohol (g) <sup>c</sup>                  | 2.850  | 0.622 | .115  | 4.579  | .000 |
| Caffeine (g) <sup>c</sup>                 | 0.344  | 0.270 | .032  | 1.275  | .203 |
| Cholesterol (g) <sup>c</sup>              | -1.728 | 0.681 | -.053 | -2.538 | .011 |
| Butyric acid (g) <sup>c</sup>             | 1.787  | 2.492 | .018  | 0.717  | .473 |
| Caproic acid (g) <sup>c</sup>             | 0.700  | 3.456 | .005  | 0.203  | .839 |
| Caprylic acid (g) <sup>c</sup>            | 2.975  | 5.672 | .013  | 0.524  | .600 |
| Capric acid (g) <sup>c</sup>              | 4.719  | 2.903 | .041  | 1.625  | .104 |
| Lauric acid (g) <sup>c</sup>              | 6.301  | 2.558 | .061  | 2.463  | .014 |
| Myristic acid (g) <sup>c</sup>            | 3.985  | 1.329 | .075  | 2.997  | .003 |
| Palmitic acid (g) <sup>c</sup>            | 6.479  | 1.153 | .141  | 5.618  | .000 |
| Stearic acid (g) <sup>c</sup>             | 7.163  | 1.177 | .152  | 6.086  | .000 |
| Palmitoleic acid (g) <sup>c</sup>         | 8.272  | 1.744 | .120  | 4.742  | .000 |
| Oleic acid (g) <sup>c</sup>               | 5.036  | 0.997 | .124  | 5.051  | .000 |
| Gadoleic acid (g) <sup>c</sup>            | 16.002 | 6.263 | .066  | 2.555  | .011 |



|                                        |        |       |       |        |      |
|----------------------------------------|--------|-------|-------|--------|------|
| Linoleic acid (g) <sup>c</sup>         | 7.007  | 0.991 | .172  | 7.068  | .000 |
| Alpha-linoleic acid (g) <sup>c</sup>   | 6.208  | 1.598 | .098  | 3.880  | .000 |
| Eicosatetraenoic acid (g) <sup>c</sup> | 19.040 | 8.887 | .049  | 2.142  | .032 |
| Eicosapentaenoic acid (g) <sup>c</sup> | -1.686 | 7.806 | -.006 | -0.216 | .829 |
| Docosahexaenoic acid (g) <sup>c</sup>  | -0.743 | 3.853 | -.005 | -0.193 | .847 |
| Canned food (fr)                       | -1.193 | 0.260 | -.119 | -4.586 | .000 |
| Processed food (fr)                    | -1.076 | 0.180 | -.150 | -5.981 | .000 |
| Antidepressants <sup>b c</sup>         | -1.542 | 1.011 | -.037 | -1.525 | .127 |
| Hypnotics <sup>b c</sup>               | -2.722 | 1.641 | -.037 | -1.658 | .097 |
| Anxiolytics <sup>b c</sup>             | -4.046 | 0.996 | -.091 | -4.063 | .000 |
| Hormonal therapy <sup>b</sup>          | 0.057  | 0.021 | .064  | 2.748  | .006 |
| Analgesics <sup>b c</sup>              | -2.260 | 0.698 | -.070 | -3.240 | .001 |
| Amphetamines <sup>b c</sup>            | -0.624 | 1.893 | -.008 | -0.330 | .742 |
| Cannabis <sup>b c</sup>                | 0.268  | 1.074 | .005  | 0.250  | .803 |
| Hallucinogens <sup>b c</sup>           | -2.812 | 6.193 | -.006 | -0.454 | .650 |
| Cocaine <sup>b c</sup>                 | 2.363  | 2.264 | .021  | 1.044  | .297 |
| Tobacco <sup>b c</sup>                 | -0.456 | 0.210 | -.055 | -2.166 | .030 |
| Cigarettes (Number) <sup>c</sup>       | -0.209 | 0.447 | -.012 | -0.468 | .640 |
| Alcohol <sup>b c</sup>                 | -1.199 | 0.318 | -.093 | -3.774 | .000 |
| Alcohol (gr/week) <sup>c</sup>         | 0.342  | 0.258 | .034  | 1.330  | .184 |
| Beer (fr) <sup>c</sup>                 | 4.666  | 0.566 | .191  | 8.240  | .000 |
| Wine (fr) <sup>c</sup>                 | 2.283  | 0.699 | .063  | 3.264  | .001 |
| Liqueur (fr) <sup>c</sup>              | -2.238 | 2.305 | -.027 | -0.971 | .332 |
| Spirit (fr) <sup>c</sup>               | -2.229 | 0.592 | -.097 | -3.767 | .000 |
| Physical activity <sup>b</sup>         | 0.752  | 0.110 | .141  | 6.848  | .000 |
| Television <sup>b</sup>                | -0.102 | 0.049 | -.054 | -2.095 | .036 |
| Radio <sup>b c</sup>                   | 1.229  | 0.425 | .073  | 2.893  | .004 |
| Computer use <sup>b c</sup>            | 3.690  | 0.332 | .247  | 11.100 | .000 |
| Reading <sup>b c</sup>                 | 1.487  | 0.466 | .078  | 3.194  | .001 |
| Hobbies <sup>b c</sup>                 | 1.100  | 0.390 | .060  | 2.820  | .005 |
| Cultural activities (fr)               | 1.322  | 0.225 | .152  | 5.886  | .000 |
| Social activities (fr)                 | 0.778  | 0.258 | .077  | 3.017  | .003 |

Note. <sup>a</sup> Dichotomous variable: sex (female = 1, male = 2); diseases (no = 0, yes = 1)

<sup>b</sup> Total intake or time = frequency x duration

<sup>c</sup> Log transformed variable

fr = frequency, WAIS-R = Wechsler Adult Intelligence Scale-Revised, MIA = Metamemory in Adulthood Scale

Supplementary Table S4. Correlations among variables and descriptive statistics.

| Variables                          | 1       | 2       | 3       | 4      | 5       | 6      | 7      | 8       | 9       | 10    | 11      | 12     | 13     | 14     | 15   | 16   |
|------------------------------------|---------|---------|---------|--------|---------|--------|--------|---------|---------|-------|---------|--------|--------|--------|------|------|
| 1. Age (years)                     | —       |         |         |        |         |        |        |         |         |       |         |        |        |        |      |      |
| 2. MMSE                            | -.27*** | —       |         |        |         |        |        |         |         |       |         |        |        |        |      |      |
| 3. MIA: Anxiety                    | .23***  | -.16*** | —       |        |         |        |        |         |         |       |         |        |        |        |      |      |
| 4. Heart rate (bpm)                | -.05*   | .03     | -.03    | —      |         |        |        |         |         |       |         |        |        |        |      |      |
| 5. MAP (mmHg) <sup>b</sup>         | .38***  | -.13*** | .00     | .18*** | —       |        |        |         |         |       |         |        |        |        |      |      |
| 6. Sodium (mg) <sup>b</sup>        | -.13*** | .00     | .01     | .00    | -.04    | —      |        |         |         |       |         |        |        |        |      |      |
| 7. Cholesterol (g) <sup>b</sup>    | -.20*** | .00     | -.04    | .07**  | .01     | .54*** | —      |         |         |       |         |        |        |        |      |      |
| 8. Linoleic acid (g) <sup>b</sup>  | -.26*** | .05*    | -.01    | .04    | -.09*** | .77*** | .51*** | —       |         |       |         |        |        |        |      |      |
| 9. Processed food (fr)             | .15***  | .02     | -.02    | .00    | .07**   | -.06*  | -.08** | -.16*** | —       |       |         |        |        |        |      |      |
| 10. Wine (fr) <sup>b</sup>         | .09***  | -.03    | -.03    | -.01   | .04     | .01    | -.02   | -.02    | -.03    | —     |         |        |        |        |      |      |
| 11. Anxiolytics <sup>a b</sup>     | .09***  | -.01    | .04     | .00    | .00     | -.01   | -.03   | -.03    | -.02    | .07** | —       |        |        |        |      |      |
| 12. Hormonal therapy <sup>a</sup>  | .09***  | -.01    | .02     | .00    | -.04    | -.04   | -.03   | -.01    | .01     | .05*  | .10***  | —      |        |        |      |      |
| 13. Physical activity <sup>a</sup> | -.15*** | .02     | -.07**  | -.07** | -.01    | .10*** | .04    | .09***  | -.01    | -.01  | -.01    | -.04   | —      |        |      |      |
| 14. Computer use <sup>a b</sup>    | -.29*** | .12***  | -.18*** | .08**  | -.08**  | .09*** | .10*** | .12***  | -.01    | .00   | -.07**  | -.07** | .14*** | —      |      |      |
| 15. Hobbies <sup>a b</sup>         | .21***  | -.07**  | .03     | -.03   | .05*    | .04    | -.01   | .02     | .00     | .04   | .01     | .07**  | -.05*  | -.08** | —    |      |
| 16. Source memory (%)              | -.58*** | .22***  | -.20*** | -.05*  | .05*    | .05*   | -.05*  | .17***  | -.15*** | .06*  | -.09*** | .06*   | .14*** | .25*** | .06* | —    |
| Mean                               | 50.1    | 28.6    | 40.9    | 69.6   | 87.7    | 1929.2 | 275.0  | 9.3     | 3.9     | 0.5   | 0.4     | 5.5    | 1.3    | 5.0    | 3.0  | 60.3 |
| SD                                 | 17.6    | 1.4     | 9.8     | 11.2   | 12.2    | 849.3  | 170.7  | 5.2     | 2.6     | 1.5   | 2.9     | 20.7   | 3.5    | 12.8   | 6.2  | 18.6 |
| Mean (log)                         |         |         |         |        | 4.5     | 7.5    | 5.5    | 2.2     |         | 0.2   | 0.1     |        |        | 0.6    | 0.7  |      |
| SD (log)                           |         |         |         |        | 0.1     | 0.4    | 0.6    | 0.5     |         | 0.5   | 0.4     |        |        | 1.2    | 1.0  |      |

Note. <sup>a</sup> Total intake or time = frequency x duration

<sup>b</sup> Log transformed variable

MMSE = Mini Mental State Scale, MIA = Metamemory in Adulthood Scale, MAP = mean arterial pressure, fr = frequency

\* p < 0.05, \*\* p < 0.01, \*\*\* p < 0.001

Supplementary Table S5. Structural equation modeling results. Coefficients in the first column are from the model without log-transformed variables. The remaining results correspond to the model with log-transformed variables. Significant results were identical in both models.

|                                |                                | <i>b</i> | <i>b</i> log | $\beta$ | <i>SE</i> $\beta$ | <i>P</i> |
|--------------------------------|--------------------------------|----------|--------------|---------|-------------------|----------|
| Age (years) →                  | MMSE                           | -0.021   | -0.021       | -.272   | .023              | .000     |
|                                | MIA: Anxiety                   | 0.125    | 0.125        | .225    | .024              | .000     |
|                                | Heart rate (bpm)               | -0.032   | -0.032       | -.050   | .025              | .046     |
|                                | MAP (mmHg) <sup>b</sup>        | 0.260    | 0.003        | .381    | .021              | .000     |
|                                | Sodium (mg) <sup>b</sup>       | -6.674   | -0.003       | -.131   | .025              | .000     |
|                                | Cholesterol (g) <sup>b</sup>   | -1.671   | -0.006       | -.196   | .024              | .000     |
|                                | Linoleic acid (g) <sup>b</sup> | -0.078   | -0.007       | -.257   | .023              | .000     |
|                                | Processed food (fr)            | 0.022    | 0.022        | .147    | .025              | .000     |
|                                | Wine (fr) <sup>b</sup>         | 0.008    | 0.003        | .085    | .025              | .001     |
|                                | Anxiolytics <sup>a b</sup>     | 0.011    | 0.002        | .085    | .025              | .001     |
|                                | Hormonal therapy <sup>a</sup>  | 0.101    | 0.101        | .087    | .025              | .001     |
|                                | Physical activity <sup>a</sup> | -0.030   | -0.030       | -.149   | .025              | .000     |
|                                | Computer use <sup>a b</sup>    | -0.178   | -0.021       | -.293   | .023              | .000     |
| Hobbies <sup>a b</sup>         | 0.071                          | 0.012    | .215         | .024    | .000              |          |
| MMSE →                         | Source memory (%)              | 0.880    | 0.873        | .063    | .021              | .002     |
| MIA: Anxiety                   |                                | -0.111   | -0.103       | -.054   | .021              | .009     |
| Heart rate (bpm)               |                                | -0.109   | -0.107       | -.065   | .020              | .002     |
| MAP (mmHg) <sup>b</sup>        |                                | 0.110    | 10.090       | .074    | .022              | .001     |
| Sodium (mg) <sup>b</sup>       |                                | -0.002   | -3.361       | -.076   | .033              | .022     |
| Cholesterol (g) <sup>b</sup>   |                                | -0.005   | -2.237       | -.068   | .024              | .005     |
| Linoleic acid (g) <sup>b</sup> |                                | 0.372    | 4.148        | .101    | .033              | .002     |
| Processed food (fr)            |                                | -0.480   | -0.489       | -.068   | .020              | .001     |
| Wine (fr) <sup>b</sup>         |                                | 0.615    | 1.943        | -.047   | .020              | .007     |
| Anxiolytics <sup>a b</sup>     |                                | -0.333   | -2.085       | .068    | .020              | .019     |
| Hormonal therapy <sup>a</sup>  |                                | 0.061    | 0.061        | .054    | .020              | .001     |
| Physical activity <sup>a</sup> |                                | 0.257    | 0.231        | .043    | .020              | .034     |
| Computer use <sup>a b</sup>    |                                | 0.083    | 1.140        | .076    | .021              | .000     |
| Hobbies <sup>a b</sup>         |                                | 0.202    | 1.016        | .056    | .020              | .006     |
| Age (years)                    |                                | -0.598   | -0.595       | -.563   | .022              | .000     |

Note. <sup>a</sup> Total intake or time = frequency x duration

<sup>b</sup> Log transformed variable

MMSE = Mini Mental State Scale, MIA = Metamemory in Adulthood Scale, MAP = mean arterial pressure, fr = frequency
